# Supplementary material for: Sustainability of renewable fuel infrastructure: a screening LCA case study of anticorrosive graphene oxide epoxy liners in steel tanks for the storage of biodiesel and its blends
Source: Royal Society of Chemistry journal article supplement (doi:10.1039/c6em00552g), 2016-12-24
Supplement: c6em00552g1.pdf [file c6em00552g1.pdf]

**Sustainability of Renewable Fuel Infrastructure: A Screening LCA Case Study of Anti-Corrosive, Graphene Oxide Epoxy Liners in Steel Tanks for Storage of Biodiesel and its Blends**

Govinda Chilkoor<sup>1</sup>, Venkata K.K. Upadhyayula<sup>2\*</sup>, Venkataramana Gadhamshetty<sup>1,4\*</sup>, Nikhil Koratkar<sup>3</sup>, Mats Tysklind<sup>2</sup>

<sup>1</sup>Civil and Environmental Engineering, South Dakota School of Mines and Technology, 501 E. St. Joseph Street, Rapid City, SD 57701, USA

<sup>2</sup>Department of Chemistry (Environmental Chemistry), Umea University, SE 90187, Umea, Sweden

<sup>3</sup>Mechanical and Nuclear Engineering and Material Science and Engineering

<sup>4</sup>Surface Engineering Research Center, South Dakota School of Mines and Technology, 501 E. St. Joseph Street, Rapid City, SD 57701, USA

**Corresponding Author1**

V. K. K. Upadhyayula, PhD

Assistant Professor, Green Technologies and Env. Economics Platform

Department of Chemistry

Umea University, SE 90187

Umea, Sweden

Email: [krishna.upadhyayula@umu.se](mailto:krishna.upadhyayula@umu.se)

**Corresponding Author2**

V. Gadhamshetty, PhD

Department of Civil and Environmental Engineering

South Dakota School of Mines and Technology

Rapid City, SDA

Email: [Venkata.Gadhamshetty@sdsmt.edu](mailto:Venkata.Gadhamshetty@sdsmt.edu)

**Contents:**

— 7 Pages

— 2 Supplementary Figures

— 2 Supplementary Tables

46 **List of Figures**

47 Figure S1. Block Diagram Showing Life Cycle Stages of Incumbent System .....3

48

49 Figure S2. Contribution analysis of GOE coating solution required for 30 m2 of steel tank interior

50 .....7

51

52 Figure S3. Contribution analysis of Incumbent System per Functional Unit.....8

53

54

55 **List of Tables**

56 Table S1. LCI Data of SGO (1 wt%)-silane composite solution per functional unit.....6

57

58 Table S2. LCI Data of GO (1 wt%)-PVK composite solution per functional unit.....6

59

60

61

62

63

64

65

66

67

68

69

70

71

72

73

74

75

76

77

78

79

80

81

82

83

84

85

86

87

88

89

90

91

92

93

94

95

96

97

98

99

100

## S1. Life Cycle Stages of the Incumbent System

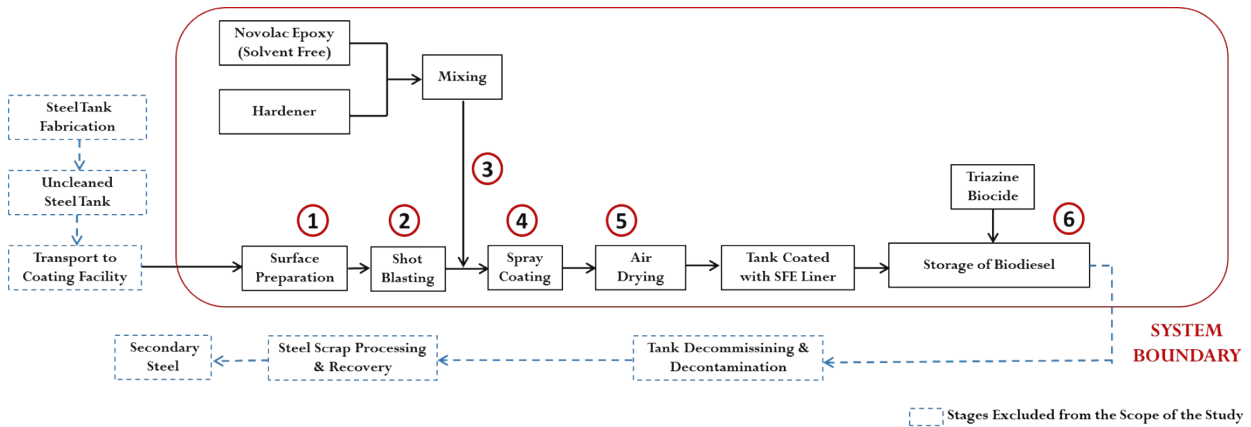

Figure S1. Block Diagram Showing Life Cycle Stages of Incumbent System (Coating of 400  $\mu\text{m}$  DFT + Addition of 125 ppm of Triazine Biocide)

For the incumbent system, the internal surface of steel sheet is surface prepared and shot

blasted prior to application of the solvent-free epoxy (SFE) coating. The SFE is then spray coated on the steel surface and dried in the air. The LCI data for the composition of the SFE coating is constructed using the commercial literature for the biodiesel tank liners.<sup>1</sup> The tank coated with the SFE liner is commissioned on an industrial site for storing biodiesel or its blends. The lifetime of the coating (20 years) is identical to the lifetime of the tank. Triazine (125 ppm) is added to biodiesel to prevent microbial growth and subsequent biofilm growth. The procedures for calculating the amount of SFE coating per functional unit (30  $\text{m}^2$ ) is given below.

### S1.1 Amount of SFE coating solution required for the Incumbent system

- Theoretical Spread Rate (TSR) ( $\text{m}^2/\text{L}$ ) =  $(\text{Vol. Solids} * 10)/(\text{DFT})$   
 $= (1000)/400 = 2.5 \text{ m}^2/\text{L}$
- Practical Spread Rate (PSR) ( $\text{m}^2/\text{L}$ ) =  $\text{TSR} * \text{Transfer Efficiency (Spray Coating)}$   
 $= 2.5 * 0.68 = 1.7 \text{ m}^2/\text{L}$
- Usage Rate (UR) ( $\text{l}/\text{m}^2$ ) =  $1/\text{PSR} = 0.588 \text{ L}/\text{m}^2$

- 124 • Amount of coating solution per functional unit ( $30 \text{ m}^2$ ) =  $30 * 0.588 \text{ L} = 17.64 \text{ L}$
- 125 • Density of the coating solution =  $1.4 \text{ kg/ L}$
- 126 • Amount of coating solution (in kg) =  $17.64 \text{ liters} * 1.4 \text{ kg/ L} = 24.7 \text{ kg}$
- 127 • Weight ratio of Resin: Hardener =  $80:20$
- 128 • Amount of Resin =  $24.7 * 0.8 = 19.75 \text{ kg}$
- 129 • Amount of Hardener =  $24.696 * 0.2 = 4.93 \text{ kg}$

130

## 131 **S2. Inventory Data Calculations for GOE Liner**

132

### 133 **S2.1. Calculating Amount of GOE Solution per Functional Unit.**

134

- 135 • Theoretical Spread Rate (TSR) ( $\text{m}^2/\text{l}$ ) =  $(\text{Vol. Solids} * 10)/(\text{DFT})$
- 136 =  $(600)/200 = 3 \text{ m}^2/\text{L}$
- 137 • Practical Spread Rate (PSR) ( $\text{m}^2/\text{l}$ ) =  $\text{TSR} * \text{Transfer Eff. (Spray Coating)}$
- 138 =  $3 * 0.68 = 2.04 \text{ m}^2/\text{L}$
- 139 • Usage Rate (UR) ( $\text{l}/\text{m}^2$ ) =  $1/\text{PSR} = 0.49 \text{ L}/\text{m}^2$
- 140 • Amount of coating solution per functional unit ( $30 \text{ m}^2$ ) =  $30 * 0.4901 \text{ L} = 14.70 \text{ L}$
- 141 • Volume of NMP Solvent in Coating =  $14.70 * 0.4 = 5.88 \text{ L}$
- 142 • Amount of NMP Solvent (kg) =  $5.88 \text{ L} * 1.03 \text{ kg/ L (Density of NMP)}$
- 143 =  $6.076 \text{ kg}$
- 144 • 97% of the solvent is recovered and recycled back into the system. This amounts to  $5.89 \text{ kg}$
- 145 • Amount of makeup solvent =  $0.186 \text{ kg.}$
- 146 • 3% of solvent emitted as VOC =  $0.186 \text{ kg.}$
- 147 • Volume of solids in coating solution =  $8.82 \text{ liters}$
- 148 • Density of the solids =  $1.17 \text{ kg/l}$
- 149 • Amount of solids in kg. =  $8.82 \text{ liters} * 1.17 \text{ kg/L} = 10.31 \text{ kg}$

- 150 • Amount of Bisphenol A Resin in Solids = 70% = 10.31\*0.7 = 7.22 kg.
- 151 • Amount of IPA = 10.31\*0.29 = 2.989 kg.
- 152 • Amount of Hardener = 10.31\*0.01 = 0.1031 kg.

153  
154  
155  
156  
157  
158

**S2.2.** Power input for batch applications is calculated based on the following empirical formula developed by Feng.<sup>2</sup>

$$W_{input} \left( \frac{KWh}{l} \right) = \frac{\text{Power of Sonotrode (W)} * \text{treatment time(seconds)}}{3.6E + 06 \left( \frac{J}{KWh} \right) * \text{volume of treated material (liters)}}$$

159  
160

161 Our study calculated the power requirements based on experimental conditions reported by  
162 Rajabi et al<sup>3</sup>. In this study, the authors used UIP 1000 hdT Ultrasonicator<sup>4</sup> with 70% amplitude  
163 which means the sonotrode power = 700 watts

164 The treatment time is 60 min. = 60 \*60 = 3600 seconds

165 Volume of treated solution = 1 liters.

166 Thus the power is calculated as

$$W_{input} \left( \frac{KWh}{l} \right) = \frac{700 * 60 * 60}{3.6E + 06 \left( \frac{J}{KWh} \right) * 1 \text{ liter}} = 0.7 KWh/l$$

167  
168

169 A recent study conducted by Kashaba et al.<sup>5</sup> has reported the energy density for dispersing  
170 MWCNT in the epoxy resin using ultrasonication for 30 mins is 810 Watt-second/ml. This is  
171 equivalent to 0.45 KWh/L for 60 min. This value for the ultrasonication energy therefore  
172 matches with the 0.7 KWh/L estimated from Equation (1) in this study.

173  
174  
175  
176  
177

### S3. LCI Data for Synthesis of Antifoulant and Antimicrobial Top Coats

#### S3.1. LCI Data for SGO-Silane Composite Coating Solution

It is assumed that the SGO with a dry film thickness (DFT) of 60  $\mu\text{m}$  and 60% solids (v/v) is applied as a top coat on the GOE liner. Based on this assumption, the amount of coating solution required /functional unit (i.e. 30  $\text{m}^2$  of coating area) is 4.41 liters. The corresponding LCI data is shown in Table S1. The 1 wt% SGO-silane solution is prepared according to the experimental procedure described in literature.<sup>6-8</sup>

Table S1 LCI Data of SGO (1 wt%)-silane composite solution per functional unit

| Inputs                                                         | Amount   |
|----------------------------------------------------------------|----------|
| <b>Material Inputs</b>                                         |          |
| Silane functionalized GO (SGO is 1% by weight in total solids) | 8.82 g   |
| Silane Solution                                                | 3.53 kg. |
| Deionized Water                                                | 617.5 g. |
| Acetic Acid                                                    | 227 g    |
| Isopropanol solvent (makeup 3%)                                | 22.05 g  |
| Solvent Recovery Burdens                                       | 706 g    |
| <b>Energy Inputs</b>                                           |          |
| Energy Consumption for Mixing                                  | 3.08 KWh |

#### S3.1. LCI Data of GO-PVK Coating Solution

It is assumed that the GO-PVK with DFT of 60  $\mu\text{m}$  and 60% (v/v) is applied as a top coat on the GOE liner. Based on this assumption, the coating solution required per functional unit (i.e. 30  $\text{m}^2$  of the interior surface with the GOE liner) is 4.41 liters. The corresponding LCI data is shown in Table S2. The 1 wt% GO-PVK solution is prepared according to experimental procedure described in literature.<sup>9-11</sup>

Table S2 LCI Data of GO (1 wt%)-PVK composite solution per functional unit

| Inputs                                                | Amount    |
|-------------------------------------------------------|-----------|
| <b>Material Inputs</b>                                |           |
| GO Dispersion in DI Water (1% by wt. in total solids) | 31.75 g   |
| Poly Vinyl Carbazole (PVK)                            | 3.144 kg. |
| Tetrahydrofuran (THF) solvent (makeup3%)              | 48.51 g.  |

|                                                 |           |
|-------------------------------------------------|-----------|
| Solvent Recovery Burdens                        | 1.521 kg  |
| Energy Inputs                                   |           |
| Energy Consumption for Mixing & Ultrasonication | 6.174 KWh |

#### S4. Contribution Analysis of Preparation GOE Coating Solution per FU (i.e. to coat 30 m<sup>2</sup>) of Steel Tank Interior

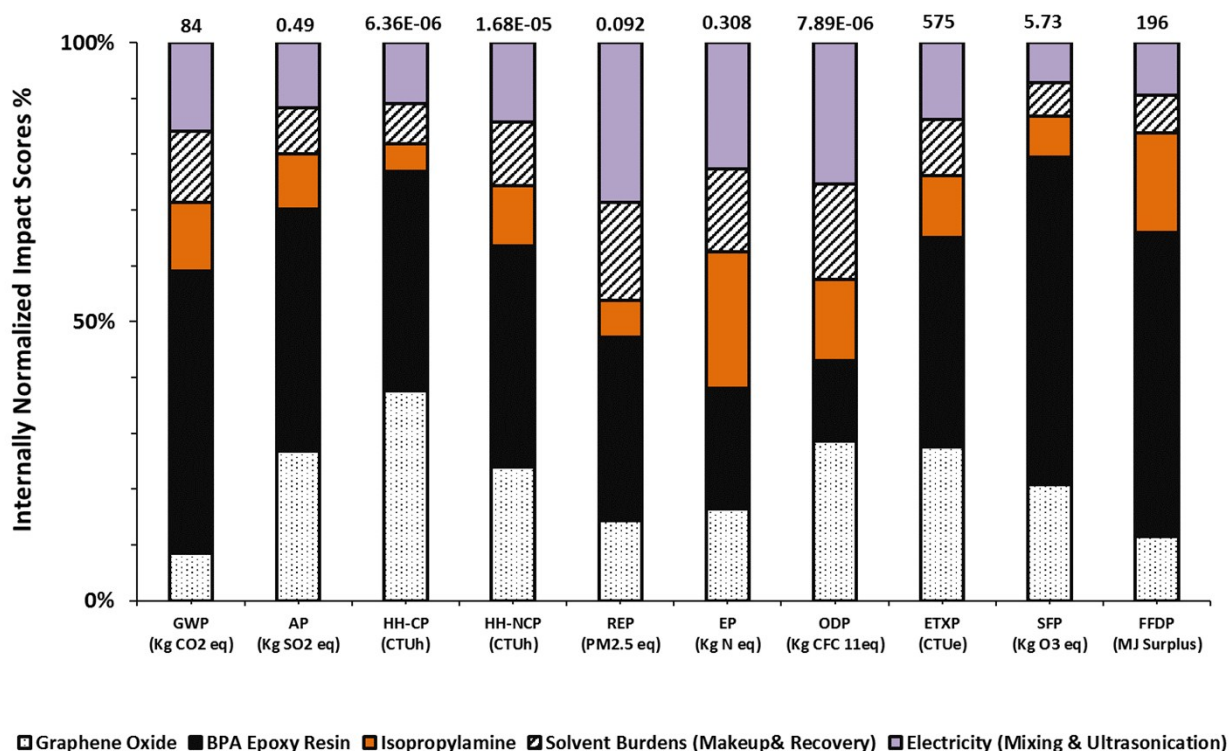

Figure S2. Contribution analysis of GOE coating solution required for 30 m<sup>2</sup> of steel tank interior

#### S5. Contribution Analysis of Incumbent System

- The incumbent system consists of 400 µm thick (DFT) solvent free novolac epoxy liner for corrosion protection and a maintenance dosage of 125 ppm (active ingredient concentration) of triazine biocide addition.
- For one year 2.5 kg of biocide needed for 10,000 liters of biodiesel storage. For 20 years, 50 kg is needed.

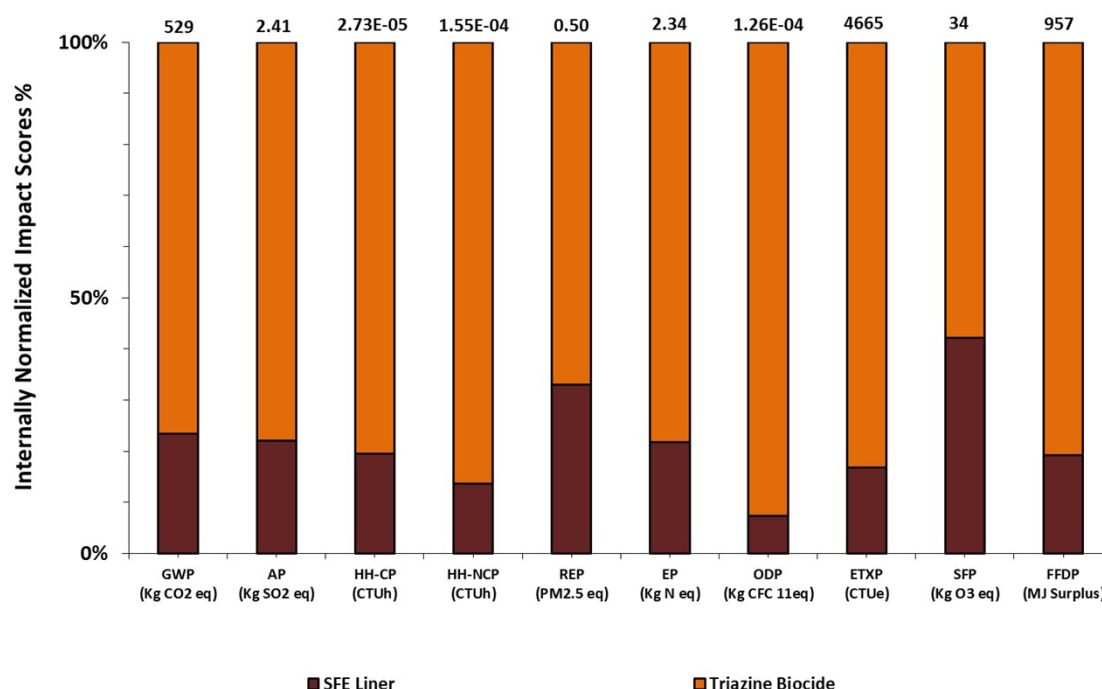

Figure S3. Contribution analysis of Incumbent System per Functional Unit

## REFERENCES

- ETB Dimensions of fuel oil storage tanks. [http://www.engineeringtoolbox.com/fuel-oil-storage-tanks-dimensions-d\\_1585.html](http://www.engineeringtoolbox.com/fuel-oil-storage-tanks-dimensions-d_1585.html) (September 27),
- Feng, H., *The thermodynamic and kinetic aspects of power ultrasound processes*. Springer Publications: London, UK, 2011; Vol. 107-125.
- Rajabi, M.; Rashed, G. R.; Zaarei, D., Assessment of graphene oxide/epoxy nanocomposite as corrosion resistance coating on carbon steel. *Corrosion Engineering Science and Technology* **2016**, *50*, (7), 509-516.
- Heilscher UIP1000hdT: Powerful and versatile homogenizer. [https://www.hielscher.com/i1000\\_p.htm](https://www.hielscher.com/i1000_p.htm) (Dec 20 2016),
- Kashaba, U. A.; Aljinaidi, A. A.; Hamed, M. A., Nanofillers modification of epocast-50-A1/946 epoxy for bonded joints. *Chinese Journal of Aeronautics* **2014**, *27*, (5), 1288-1300.
- Ahmadi, A.; Ramezanzadeh, B.; Mahdavian, M., Hybrid silane coating reinforced with silanized graphene oxide nanosheets with improved corrosion protective performance *RSC Advances* **2016**, *6*, 54102-54112.
- Li, J.; Cui, J.; Yang, J.; Ma, Y.; Qiu, H.; Yang, J., Silanized graphene oxide reinforced organofunctional composite coatings for corrosion protection *Progress in Organic Coatings* **2016**, *99*, 443-451.
- Xu, Z.; Zhang, J.; Shan, M.; Li, Y.; Li, B.; Niu, J.; Zhou, B.; Qian, X., Organosilane functionalized graphene oxide for enhanced antifouling and mechanical properties of polyvinylidene fluoride ultrafiltration membranes. *Journal of Membrane Science* **2014**, *458*, 1-13.
- Rodrigues, D. F. *Application of graphene oxide nanomaterials on surfaces*; Sustainable Nanotechnology Organization Houston, TX, USA, 2013; pp 1-21.
- Santos, C. M.; Mangadlao, J.; Ahmed, F.; Leon, A.; Advincula, R. C.; Rodrigues, D. F., Graphene nanocomposite for biomedical applications: fabrication, antimicrobial and cytotoxic investigations. *Nanotechnology* **2012**, *23*, (395101), 1-10.
- Santos, C. M.; Tria, M. C. R.; Vergara, R. A. M. V.; Ahmed, F.; Advincula, R. C.; Rodrigues, D. F., Antimicrobial graphene polymer (PVK-GO) nanocomposite films. *Chem. Comm.* **2011**, *47*, (31), 8892-8894.
